# Supplementary material for: Synthesis and Hydrogelation of Star-Shaped Graft Copolypetides with Asymmetric Topology
Source: MDPI journal article supplement (doi:10.3390/gels8060366), 2022-06-09
Supplement: s1 [file s1]

## Article

# Synthesis and Hydrogelation of Star-Shaped Graft Copolypeptides with Asymmetric Topology

Thi Ha My Phan <sup>1,†</sup>, Yu-Hsun Yang <sup>1,†</sup>, Yi-Jen Tsai <sup>1</sup>, Fang-Yu Chung <sup>1</sup>, Tooru Ooya <sup>2,3</sup>, Shiho Kawasaki <sup>2</sup> and Jeng-Shiung Jan <sup>1,4\*</sup>

<sup>1</sup> Department of Chemical Engineering, National Cheng Kung University, Tainan 70101, Taiwan; n36087113@gs.ncku.edu.tw (T.H.M.P.); e34074093@gs.ncku.edu.tw (Y.-H.Y.); n36094704@gs.ncku.edu.tw (Y.-J.T.); f54081036@gs.ncku.edu.tw (F.-Y.C.)

<sup>2</sup> Graduate School of Engineering, Kobe University, Kobe 657-8501, Japan; ooya@tiger.kobe-u.ac.jp (T.O.); shihoshi@stu.kobe-u.ac.jp (S.K.)

<sup>3</sup> Center of Advanced Medical Engineering Research & Development (CAMED), Kobe University, Kobe 657-8501, Japan

<sup>4</sup> Hierarchical Green-Energy Materials (Hi-GEM) Research Center, National Cheng Kung University, Tainan 70101, Taiwan

\* Correspondence: jsjan@mail.ncku.edu.tw

† These authors contributed equally to this work

**Table S1.** Characterization of star-shaped poly (Z-L-lysine) homopolypeptides (s-PZLL). The degree of polymerizations (DP), number-averaged molecular weights ( $M_n$ ), and ratio of weight-averaged molecular weight to number-averaged molecular weight ( $M_w/M_n$ ) were calculated from proton nuclear magnetic resonance (<sup>1</sup>H NMR) and gel permeation chromatography-light scattering (GPC-LS) analyses.

| Polypeptides            | Feed ratio | <sup>1</sup> H NMR |                                 | GPC                             |           |        |
|-------------------------|------------|--------------------|---------------------------------|---------------------------------|-----------|--------|
|                         |            | DP                 | $M_n$<br>(g mol <sup>-1</sup> ) | $M_n$<br>(g mol <sup>-1</sup> ) | $M_w/M_n$ | D<br>P |
| 6s- PZLL <sub>32</sub>  | 1:90       | 32.1               | 50654                           | 50800                           | 1.16      | 32.0   |
| 12s- PZLL <sub>12</sub> | 1:180      | 11.9               | 34121                           | 32200                           | 1.99      | 10.0   |
| 24s- PZLL <sub>12</sub> | 1:480      | 12.3               | 72109                           | 55600                           | 1.52      | 8.6    |

**Table S2.** Radius of gyration ( $R_g$ ) of nano-assemblies in star-shaped graft copolypeptides. The concentration of all samples was 8.0 wt%. The data was fitted from Small-angle X-ray scattering (SAXS) analysis using SasView software (version 5.0.4).

| Polypeptide                                     | $R_g$ (Å) |
|-------------------------------------------------|-----------|
| 12s-PLL <sub>12</sub> -g-Indo <sub>0.10</sub>   | 151       |
| 12s-PLL <sub>12</sub> -g-Phenyl <sub>0.08</sub> | 161       |
| 24s-PLL <sub>12</sub> -g-Indo <sub>0.11</sub>   | 215       |
| 24s-PLL <sub>12</sub> -g-Phenyl <sub>0.13</sub> | 192       |

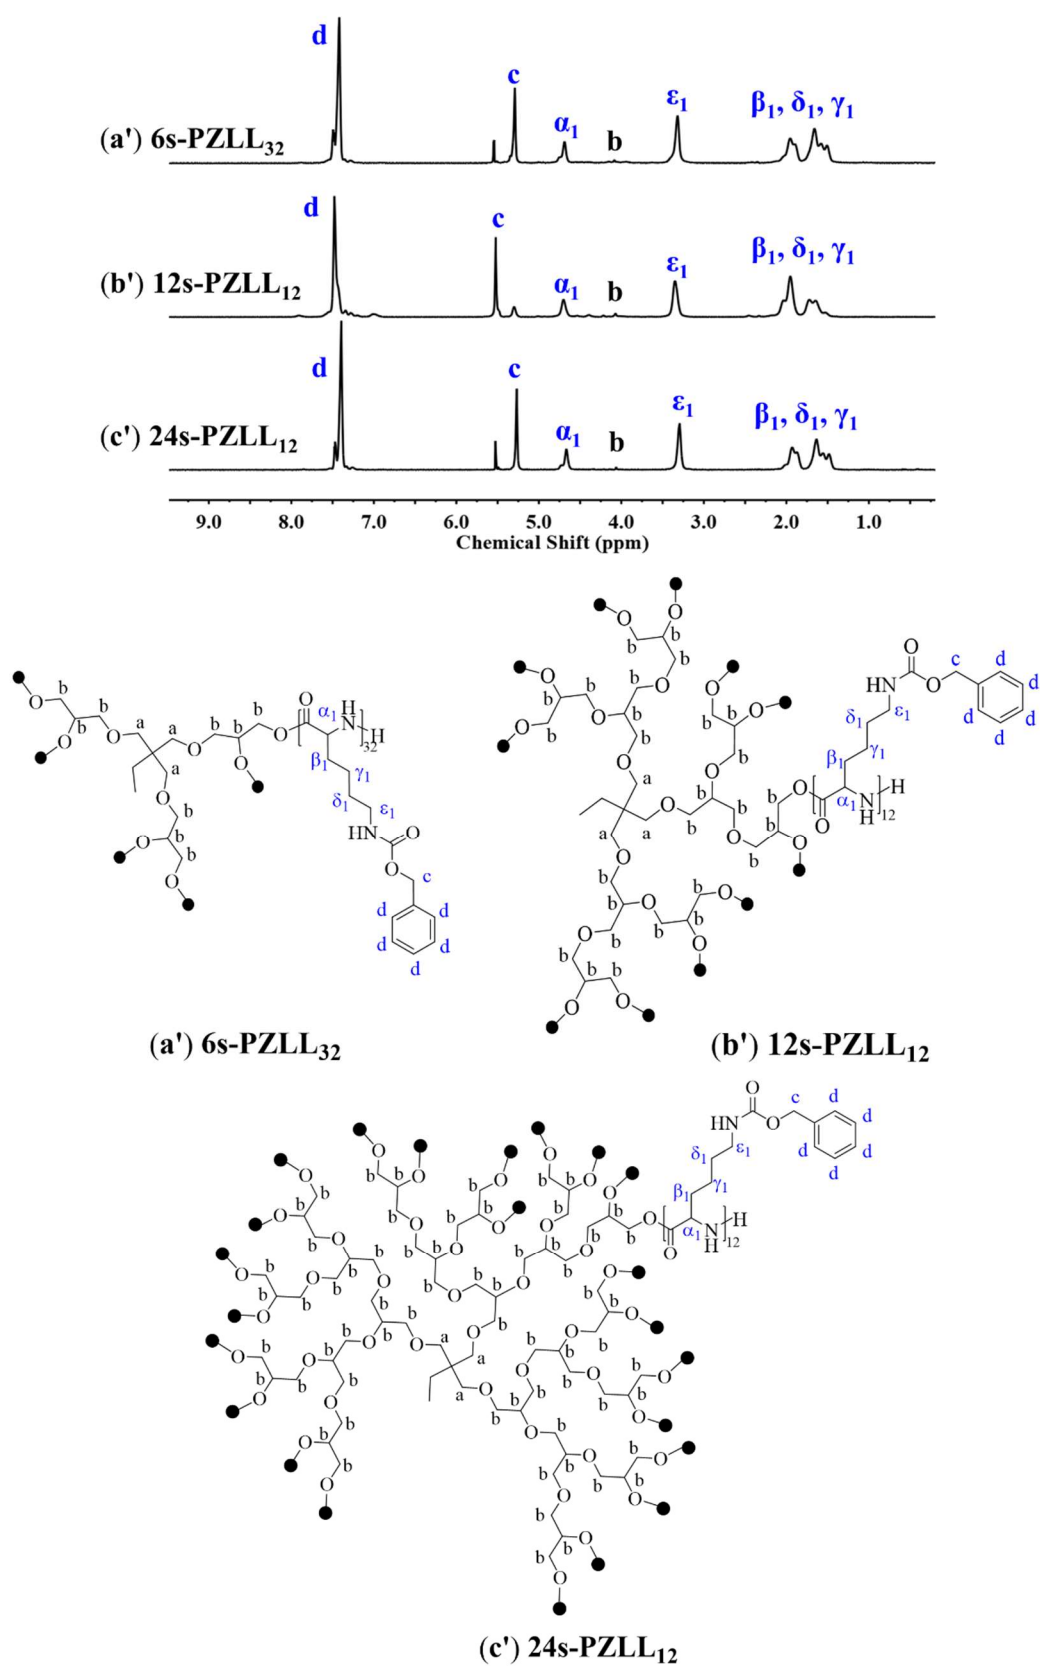

**Figure S1.**  $^1\text{H}$  NMR of (a') 6s-PZLL<sub>32</sub>, (b') 12s-PZLL<sub>12</sub>, and (c') 24s-PZLL<sub>12</sub> homopolypeptides in trifluoroacetic acid- $d_1$  (TFA- $d_1$ ). The symbols were used to represent the different protons.

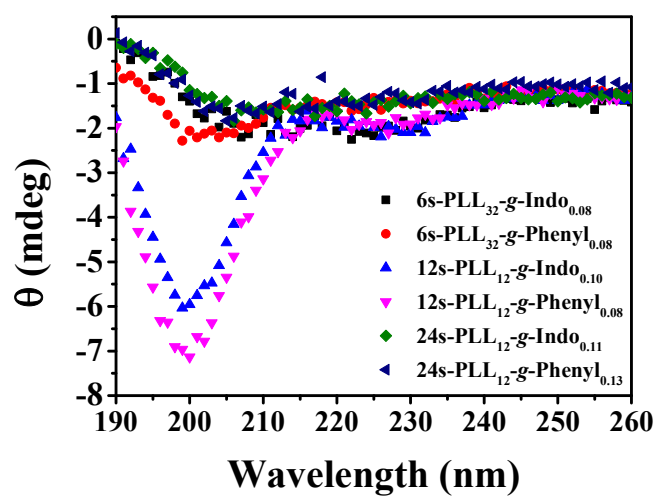

Figure S2. Circular dichroism (CD) spectra of graft polypeptides at 0.1 mg/mL.

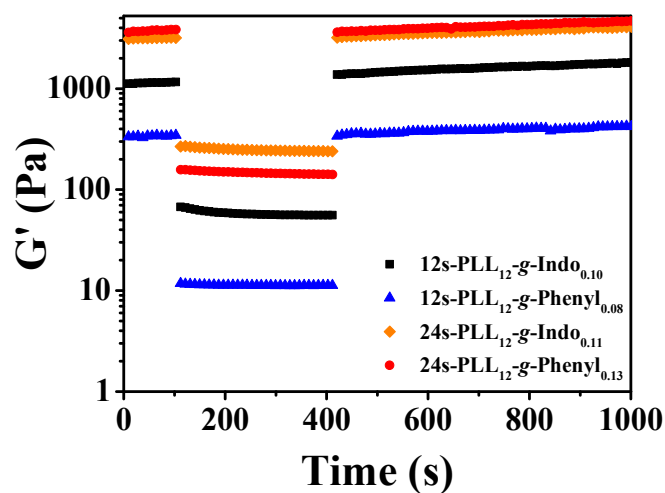

Figure S3. Recovery behavior of 12-armed and 24-armed polypeptide hydrogels. The concentration of hydrogel samples was 8.0 wt%. The rheological measurement was operated at 1 rad/s of frequency, room temperature and various strain at three continuous periods: 1.0% for 100s, 100.0% for 300s, and 1.0% for 600s.
